# Supplementary material for: High PTPN13 expression in high grade serous ovarian carcinoma is associated with a better patient outcome
Source: PubMed Central journal article supplement (PMC5707051; doi:10.18632/oncotarget.21175), 2017-09-21
Supplement: oncotarget-08-95662-s001.pdf [file oncotarget-08-95662-s001.pdf]

# High PTPN13 expression in high grade serous ovarian carcinoma is associated with a better patient outcome

## SUPPLEMENTARY MATERIALS

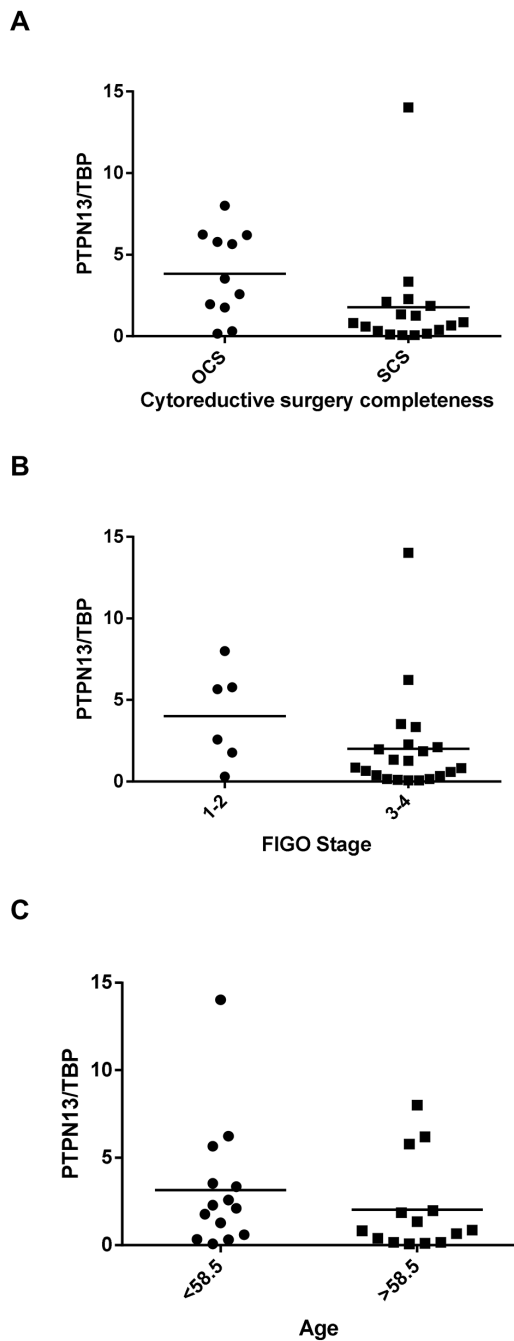

Supplementary Figure 1: Relative *PTPN13* mRNA expression in HGSOC samples. (A) According to cytoreductive surgery completeness. (B) According to the FIGO stage of the tumor. (C) According to the patients' age (see Table 1A).

### 204201\_s\_at

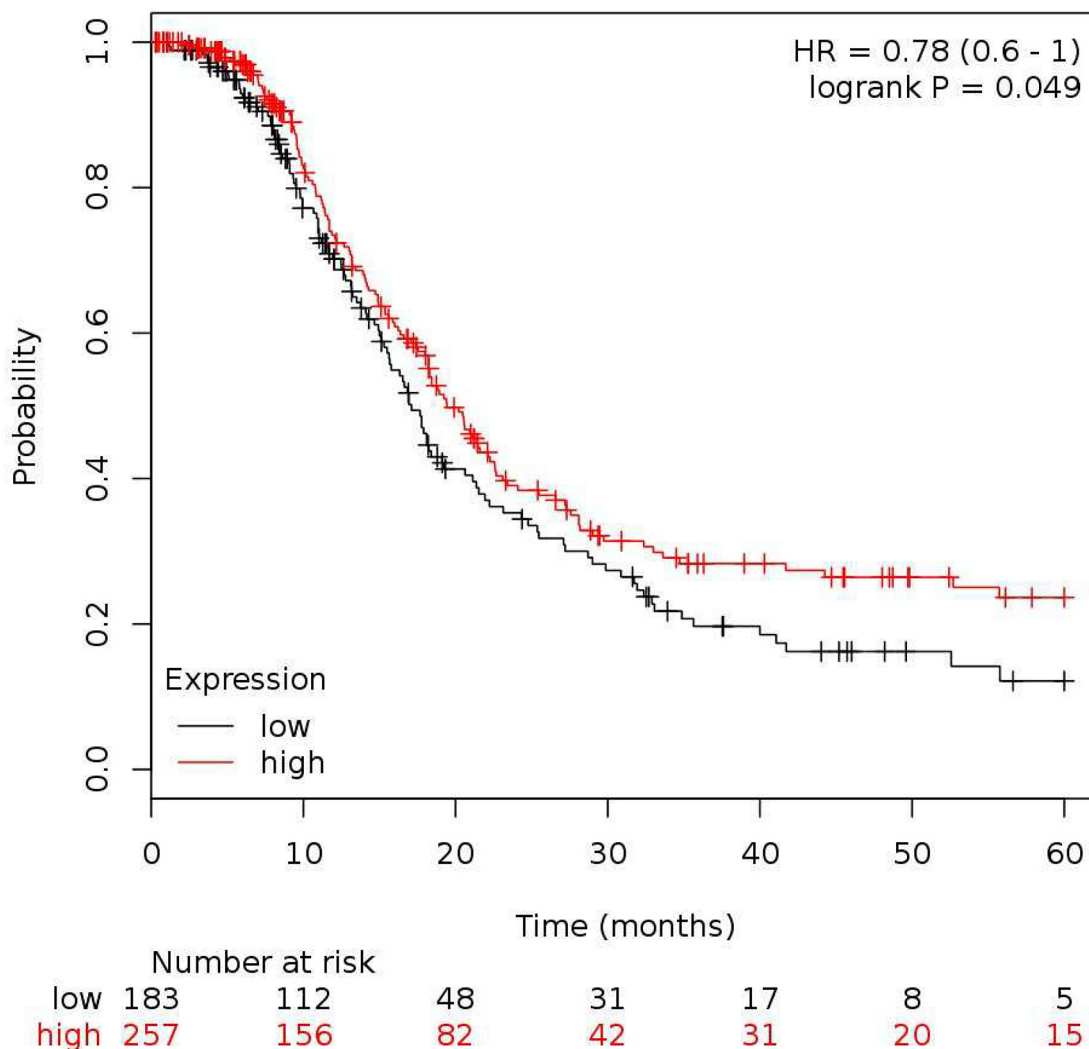

**Supplementary Figure 2: Survival analysis was performed using TCGA metadata on ovarian cancer tumor samples (Serous, Grade 3) and the on-line Km-plotter tool.** The Kaplan–Maier curves of progression-free survival time relative to the tumor PTPN13 expression (low/high), the hazard ratio with 95% confidence intervals and log-rank test P values at 5 years were calculated using the 204201\_s\_at probe set and automatically selected cut-offs.

**Supplementary Table 1: Ct values obtained by quantitative RT-PCR. HGSOc samples are identified by a number. Standard: SKOV3; TBP: internal control.**

See Supplementary File 1
